# Supplementary material for: Evolutionary analyses of the gasdermin family suggest conserved roles in infection response despite loss of pore-forming functionality
Source: PubMed Central journal article supplement (PMC8742441; doi:10.1186/s12915-021-01220-z), 2022-01-07
Supplement: 12915_2021_1220_MOESM8_ESM.pdf [file 12915_2021_1220_MOESM8_ESM.pdf]

**Additional File 8. Uncropped membranes Supplementary Figure S6**

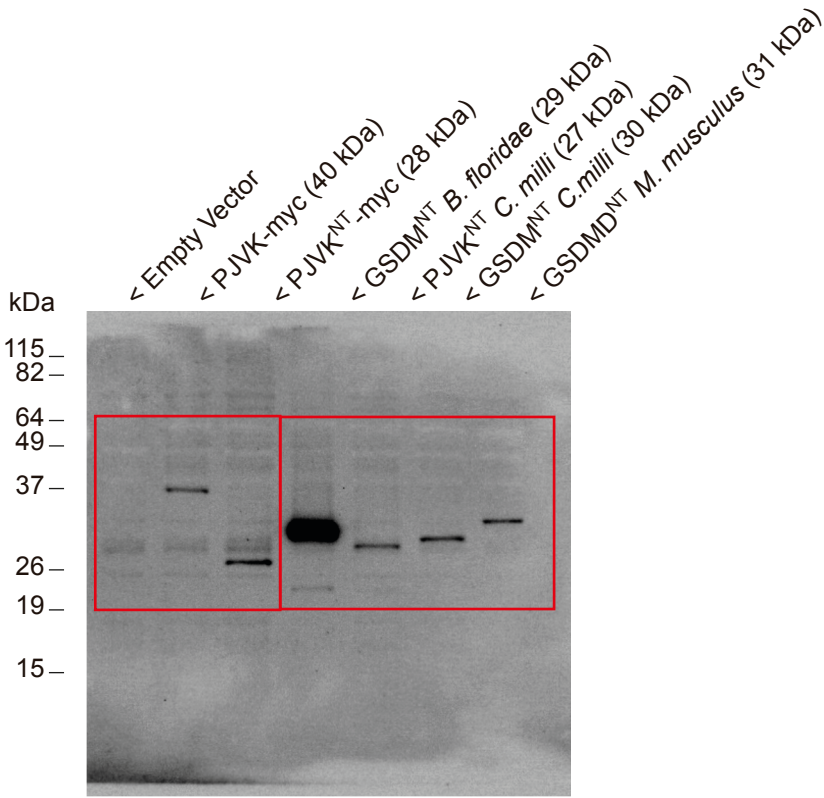

anti-Myc mouse monoclonal (1st antibody)  
(Clone 4A6, EMD Millipore Corp, 1:1000)

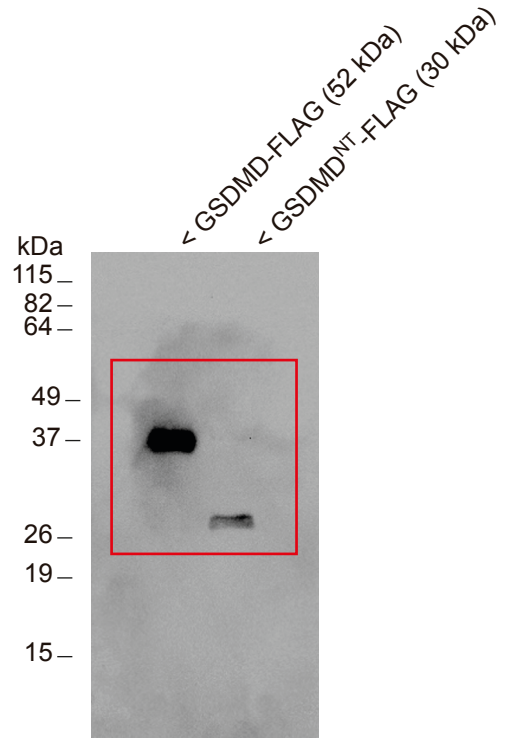

anti-FLAG mouse monoclonal (1st antibody)  
(Clone M2, Sigma, 1:1000)

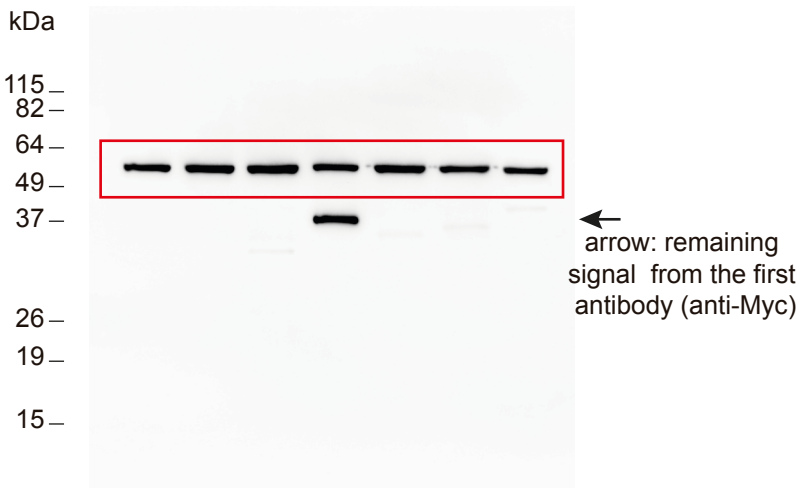

anti-β-actin mouse monoclonal (2nd antibody)  
(Clone C4, Santa Cruz, 1:10000)

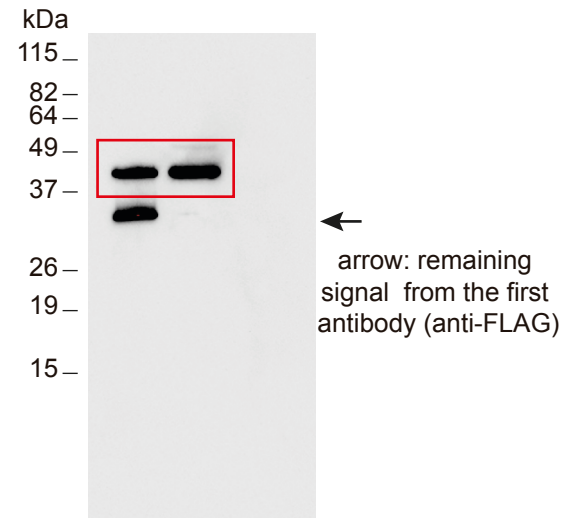

anti-β-actin mouse monoclonal (2nd antibody)  
(Clone C4, Santa Cruz, 1:10000)
